# Supplementary material
Source: MDPI journal article supplement (https://www.mdpi.com/1424-8247/15/11/1380)
Supplement: s1 [file s1]

**Supplementary Table S2.** PubMed Search Terms and Results for the *Ericaceae* Family.

| Search Terms in PubMed                | Results | Relevant        | Notes                                               | # of Relevant Papers: Elimination based on detailed paper review |
|---------------------------------------|---------|-----------------|-----------------------------------------------------|------------------------------------------------------------------|
| Ericaceae protein trafficking         | 22      | Many irrelevant | Mostly plant focused                                |                                                                  |
| Ericaceae protein trafficking human   | 4       |                 |                                                     | 3                                                                |
| Ericaceae human motor protein         | 5       | Irrelevant      |                                                     |                                                                  |
| Ericaceae human dynein                | 0       |                 |                                                     |                                                                  |
| Ericaceae human kinesin               | 0       |                 |                                                     |                                                                  |
| Ericaceae human microtubules          | 1       |                 |                                                     | 1                                                                |
| Ericaceae human actin                 | 4       |                 |                                                     | 2                                                                |
| Ericaceae human vimentin              | 2       |                 |                                                     | 2                                                                |
| Ericaceae human lamin                 | 0       |                 |                                                     |                                                                  |
| Ericaceae human golgi                 | 0       |                 |                                                     |                                                                  |
| Ericaceae human endoplasmic reticulum | 2       |                 |                                                     | 2                                                                |
| Ericaceae human lysosome              | 0       |                 |                                                     |                                                                  |
| Ericaceae human signaling             | 121     |                 | Many and thus performed more focused searches below |                                                                  |
| Ericaceae human MAPK                  | 19      |                 | Overlap in some articles in these categories        | 18                                                               |
| Ericaceae human AKT                   | 33      |                 |                                                     | 33                                                               |
| Ericaceae human PI3K                  | 13      |                 |                                                     | 13                                                               |
| Ericaceae human JAK                   | 3       |                 |                                                     | 3                                                                |
| Ericaceae human STAT                  | 7       |                 |                                                     | 6                                                                |
| Ericaceae human EGFR                  | 6       |                 |                                                     | 5                                                                |
| Ericaceae human adenylyl cyclase      | 0       |                 |                                                     |                                                                  |
| Ericaceae human phospholipase C       | 0       |                 |                                                     |                                                                  |
| Ericaceae human GPCR                  | 0       |                 |                                                     |                                                                  |
