# Supplementary material
Source: MDPI journal article supplement (https://www.mdpi.com/1424-8247/15/11/1380)
Supplement: s1 [file s1]

**Supplementary Table S1.** PubMed Search Terms and Results for the *Cucurbitaceae* Family.

| Search Terms in PubMed                   | Results | Relevant                                                               | Notes                                                 | # of Relevant Papers: Elimination based on detailed paper review |
|------------------------------------------|---------|------------------------------------------------------------------------|-------------------------------------------------------|------------------------------------------------------------------|
| Cucurbitacin protein trafficking         | 213     | Too many irrelevant (plant-based mostly)                               | Therefore, focused the search to humans.              |                                                                  |
| Cucurbitacin protein trafficking human   | 8       | 6                                                                      |                                                       | 5                                                                |
| Cucurbitacin human motor protein         | 1       | Irrelevant                                                             |                                                       |                                                                  |
| Cucurbitacin human dynein                | 0       |                                                                        |                                                       |                                                                  |
| Cucurbitacin human kinesin               | 0       |                                                                        |                                                       |                                                                  |
| Cucurbitacin human microtubules          | 13      | ALL Relevant                                                           |                                                       | 12                                                               |
| Cucurbitacin human actin                 | 37      | 36 Relevant                                                            | Many articles are overlapping within these categories | 28                                                               |
| Cucurbitacin human vimentin              | 3       | ALL Relevant                                                           |                                                       | 3                                                                |
| Cucurbitacin human lamin                 | 0       |                                                                        |                                                       |                                                                  |
| Cucurbitacin human golgi                 | 0       |                                                                        |                                                       |                                                                  |
| Cucurbitacin human endoplasmic reticulum | 3       | ALL Relevant                                                           |                                                       | 2                                                                |
| Cucurbitacin human lysosome              | 5       | ALL Relevant                                                           |                                                       | 3                                                                |
| Cucurbitacin human signaling             | 204     | Did not assess (too many) - therefore focused search terms - see below | Many articles are overlapping within these categories |                                                                  |
| Cucurbitacin human MAPK                  | 28      |                                                                        |                                                       | 18                                                               |
| Cucurbitacin human AKT                   | 41      |                                                                        |                                                       | 23                                                               |
| Cucurbitacin human PI3K                  | 18      |                                                                        |                                                       | 12                                                               |
| Cucurbitacin human JAK                   | 30      |                                                                        |                                                       | 17                                                               |
| Cucurbitacin human STAT                  | 25      |                                                                        |                                                       | 10                                                               |
| Cucurbitacin human EGFR                  | 18      |                                                                        |                                                       | 11                                                               |
| Cucurbitacin human adenylyl cyclase      | 1       |                                                                        |                                                       | 1                                                                |
| Cucurbitacin human phospholipase C       | 0       |                                                                        |                                                       |                                                                  |
| Cucurbitacin human GPCR                  | 0       |                                                                        |                                                       |                                                                  |
