# Supplementary material
Source: MDPI journal article supplement (https://www.mdpi.com/1424-8247/15/11/1380)
Supplement: s1 [file s1]

**Supplementary Table S3.** PubMed Search Terms and Results for the *Rosaceae* Family.

| Search Terms in PubMed               | Results | Relevant | Notes                                               | # of Relevant Papers: Elimination based on detailed paper review |
|--------------------------------------|---------|----------|-----------------------------------------------------|------------------------------------------------------------------|
| rosaceae protein trafficking         | 217     |          | Plant focused                                       |                                                                  |
| rosaceae protein trafficking human   | 34      |          |                                                     |                                                                  |
| rosaceae human motor protein         | 4       | 0        | Irrelevant                                          |                                                                  |
| rosaceae human dynein                | 0       |          |                                                     |                                                                  |
| rosaceae human kinesin               | 0       |          |                                                     |                                                                  |
| rosaceae human microtubules          | 4       | 4        |                                                     | 4                                                                |
| rosaceae human actin                 | 13      |          |                                                     | 12                                                               |
| rosaceae human vimentin              | 8       |          |                                                     | 8                                                                |
| rosaceae human lamin                 | 0       |          |                                                     | 1                                                                |
| rosaceae human golgi                 | 1       |          |                                                     |                                                                  |
| rosaceae human endoplasmic reticulum | 12      |          |                                                     | 11                                                               |
| rosaceae human lysosome              | 6       |          |                                                     | 3                                                                |
| rosaceae human signaling             | 324     |          | Too many so utilize focused terms within this topic |                                                                  |
| rosaceae human MAPK                  | 48      |          | Some overlap amongst these articles                 | 47                                                               |
| rosaceae human AKT                   | 49      |          |                                                     | 48                                                               |
| rosaceae human PI3K                  | 19      |          |                                                     | 19                                                               |
| rosaceae human JAK                   | 4       |          |                                                     | 4                                                                |
| rosaceae human STAT                  | 7       |          |                                                     | 7                                                                |
| rosaceae human EGFR                  | 16      |          |                                                     | 16                                                               |
| rosaceae human adenylyl cyclase      | 1       |          |                                                     | 1                                                                |
| rosaceae human phospholipase C       | 1       |          |                                                     | 1                                                                |
| rosaceae human GPCR                  | 3       |          |                                                     | 3                                                                |
